# Supplementary material for: A Draft Map of the Human Ovarian Proteome for Tissue Engineering and Clinical Applications
Source: PubMed Central journal article supplement (PMC6427241; doi:10.1074/mcp.ra117.000469), 2018-02-23
Supplement: 133897_1_supp_76620_p4744r.pdf [file 133897_1_supp_76620_p4744r.pdf]

# Supplemental figures

## S1. Pathway diagrams of estrogen signaling, RAS and cGMP/PKG

Proteins detected by MS were mapped using the KEGG database to understand their interaction and elucidate their functions. Identified proteins within **a)** the estrogen signaling pathway, **b)** cyclic GMP-protein kinase G (cGMP/PKG) and **c)** the renin angiotensin system (RAS) are marked with a red star.

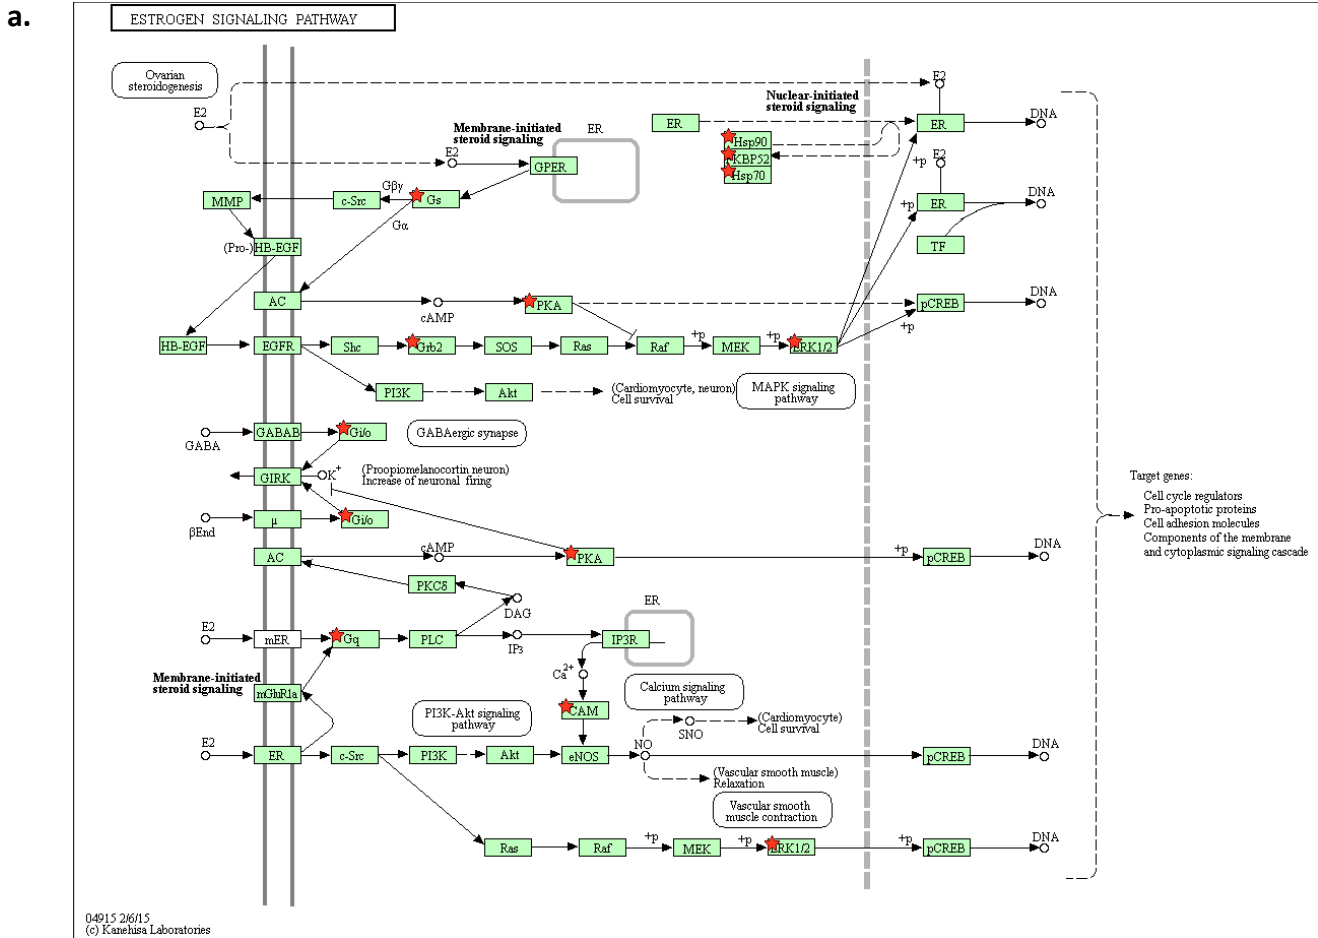

b.

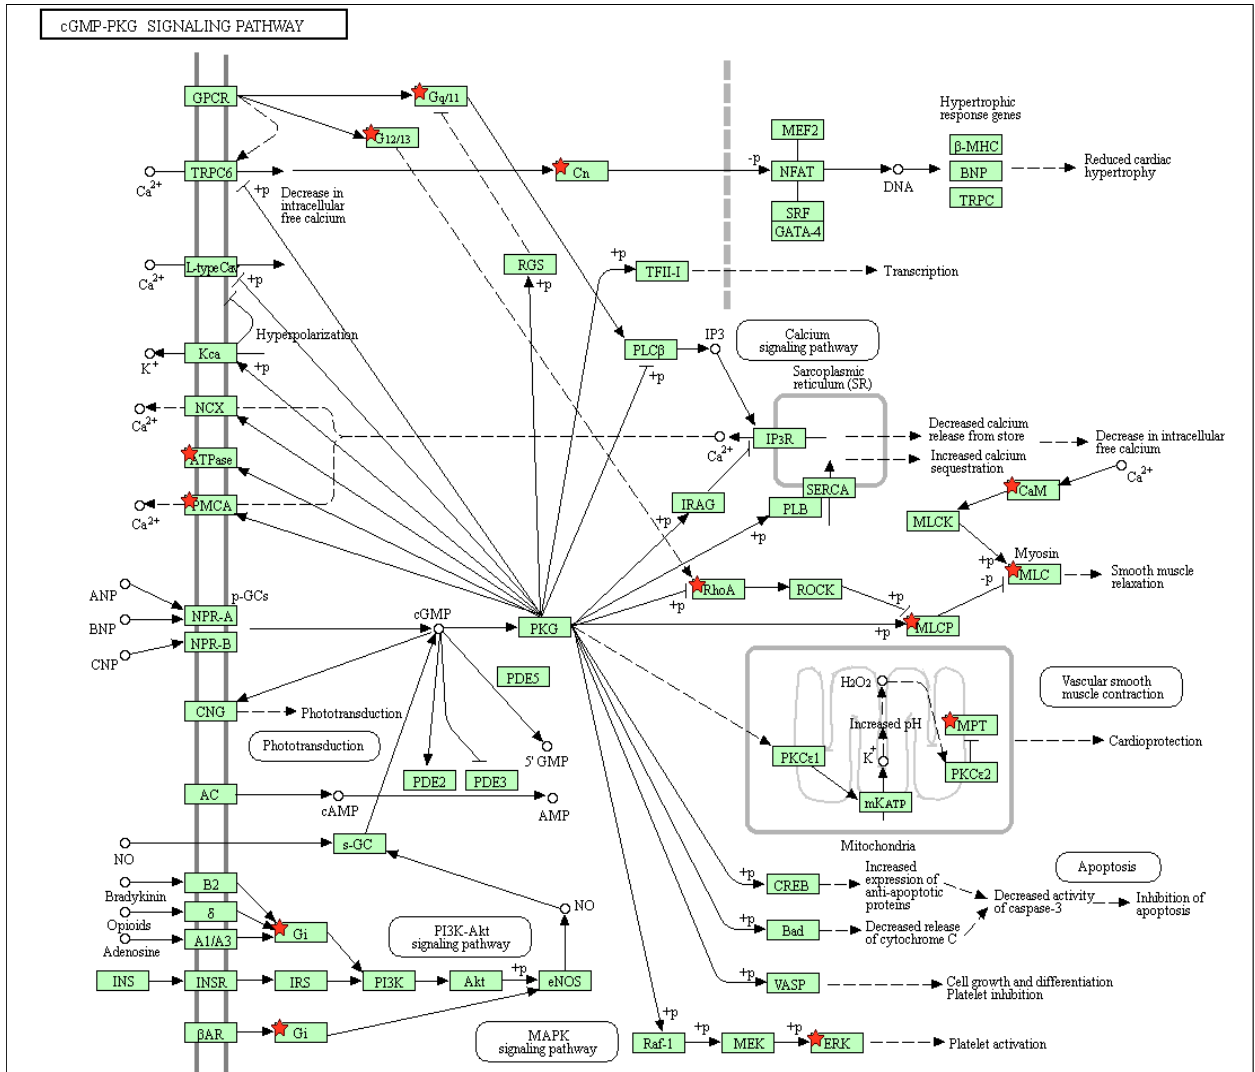

C.

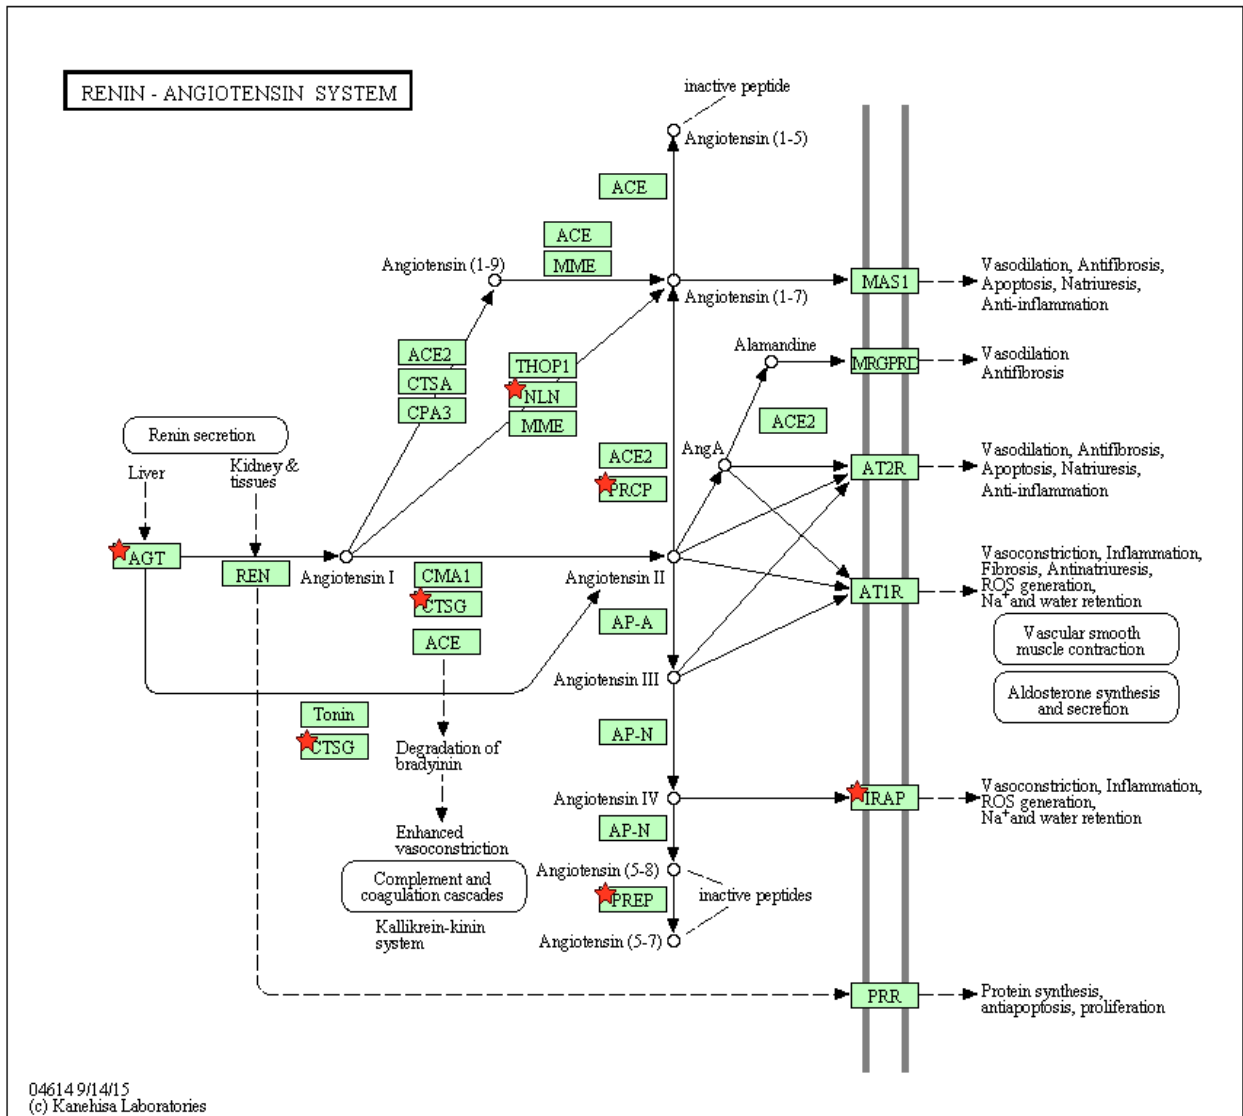

## S2. Clinical characteristics of ovarian tissue donor patients

|                                | Patients                                                                                                                                                                                                                  |                                                                                                                                  |                                                                                                |
|--------------------------------|---------------------------------------------------------------------------------------------------------------------------------------------------------------------------------------------------------------------------|----------------------------------------------------------------------------------------------------------------------------------|------------------------------------------------------------------------------------------------|
|                                | P1                                                                                                                                                                                                                        | P2                                                                                                                               | P3                                                                                             |
| <b>Age</b>                     | 30                                                                                                                                                                                                                        | 49                                                                                                                               | 59                                                                                             |
| <b>Number of live births</b>   | 0                                                                                                                                                                                                                         | 2                                                                                                                                | 2                                                                                              |
| <b>Number of abortions</b>     | 0                                                                                                                                                                                                                         | 1                                                                                                                                | 2                                                                                              |
| <b>Gynecologic disease</b>     | Peritoneal endometriosis                                                                                                                                                                                                  | Menometrorrhagia                                                                                                                 | BRCA1 mutation                                                                                 |
| <b>ICD-10<sup>1</sup> code</b> | N80.3                                                                                                                                                                                                                     | N92                                                                                                                              | Z15.01                                                                                         |
| <b>Clinical stage</b>          | -                                                                                                                                                                                                                         | -                                                                                                                                | pTis (DCIS) <sup>2</sup> pN0 <sup>3</sup>                                                      |
| <b>Surgery</b>                 | Unilateral salpingectomy by laparoscopy                                                                                                                                                                                   | Radical hysterectomy by laparoscopy                                                                                              | Radical hysterectomy by laparoscopy                                                            |
| <b>Histology evaluation</b>    | Paramesonephric paratubal cyst; left hydrosalpinx associated with endometriotic tubular lesions; no sign of malignancy; no ovarian samples for analysis (ovaries not affected by the disease, as observed by the surgeon) | Bulky submucous uterine leiomyoma; superficial uterine adenomyosis; menstrual endometrium; normal ovaries; no sign of malignancy | Atrophic endometrium and uterine adenomyosis; normal cervix and ovaries; no sign of malignancy |
| <b>Hormonal treatment</b>      | Zoladex                                                                                                                                                                                                                   | NO                                                                                                                               | NO                                                                                             |

<sup>1</sup>ICD-10 code: International Statistical Classification of Diseases and Related Health Problems, 10th Revision

<sup>2</sup>pTis (DCIS): Ductal carcinoma in situ

<sup>3</sup>pN0: No regional lymph node metastasis identified
